# Supplementary material
Source: publisher figshare collection journal article supplement (https://gsajournals.figshare.com/ndownloader/files/25833953)
Supplement: Supplementary file 1 [file 25833953]

**Figure S2.** The new threespine stickleback genome (v. 5) incorporated contigs from a Paxton Lake male fish and unplaced contigs from the v. 4 genome.
